# Supplementary material
Source: publisher figshare collection journal article supplement (https://sage.figshare.com/ndownloader/files/13182917)
Supplement: Supplementary file 1 [file 13182917]

**Supplementary files for the manuscript “Scheduled emergency trauma operation: The green line orthopaedic trauma surgery process of care”**

**Tables**

Supplementary table 1. Comparison of demographics and clinical variables between green line process operations (GLPs) and inpatient emergency operations (IEOs)

|     |                  | GLP           | IEO           | p-value |
|-----|------------------|---------------|---------------|---------|
| Age | Mean (SD)        | 48 years (19) | 61 years (22) | <0.0001 |
|     | Less than 65 (%) | 1436 (78)     | 2920 (50)     | <0.0001 |
|     | 65 or older (%)  | 394 (22)      | 2913 (50)     |         |
|     |                  |               |               |         |
| ASA | 1 (%)            | 795 (42)      | 1188 (19)     | <0.0001 |
|     | 2 (%)            | 671 (35)      | 1677 (27)     |         |
|     | 3 (%)            | 388 (20)      | 2492 (41)     |         |
|     | 4-5 (%)          | 43 (2)        | 751 (12)      |         |

## Figures

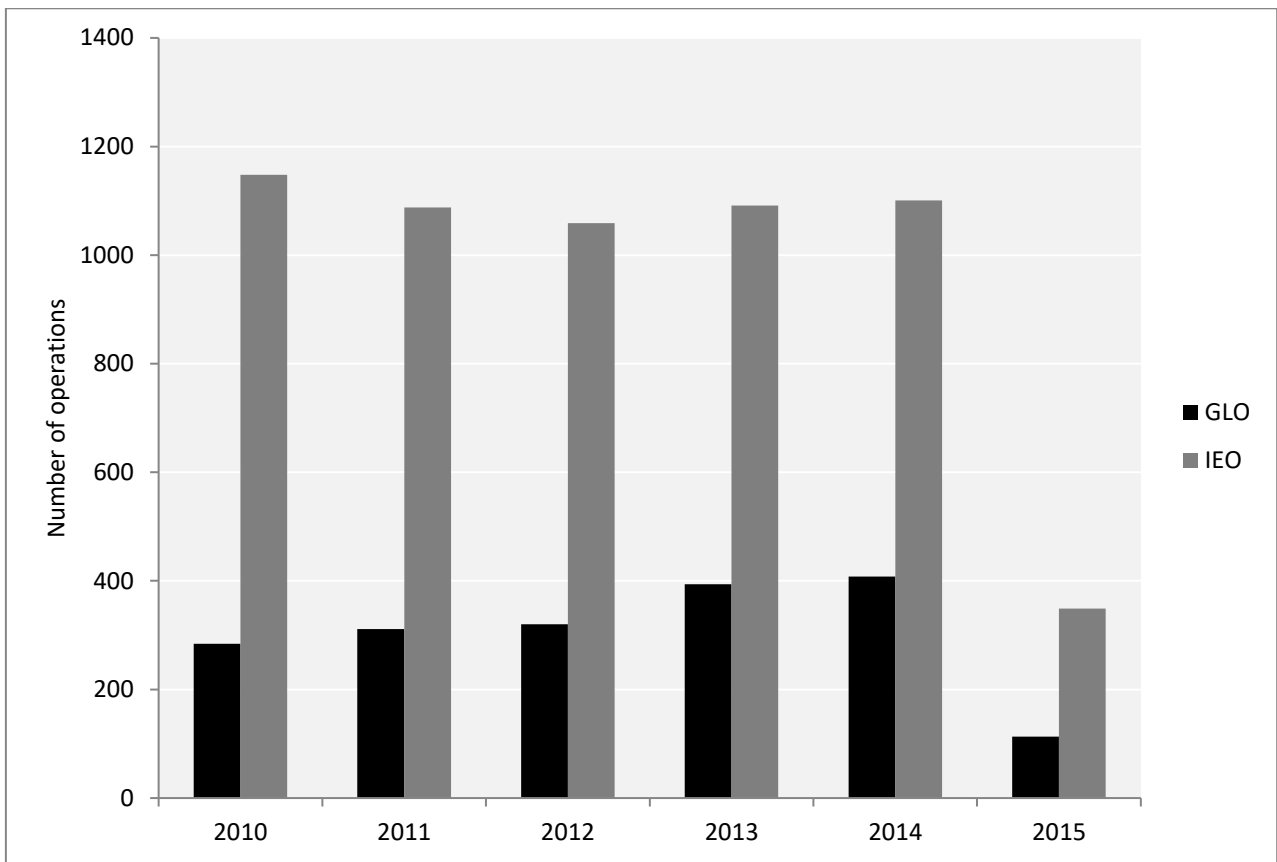

Supplementary figure 1: Annual number of green line operations (GLPs, black) and inpatient emergency operations (IEOs, grey). Data for year 2015 are only available to April 23rd

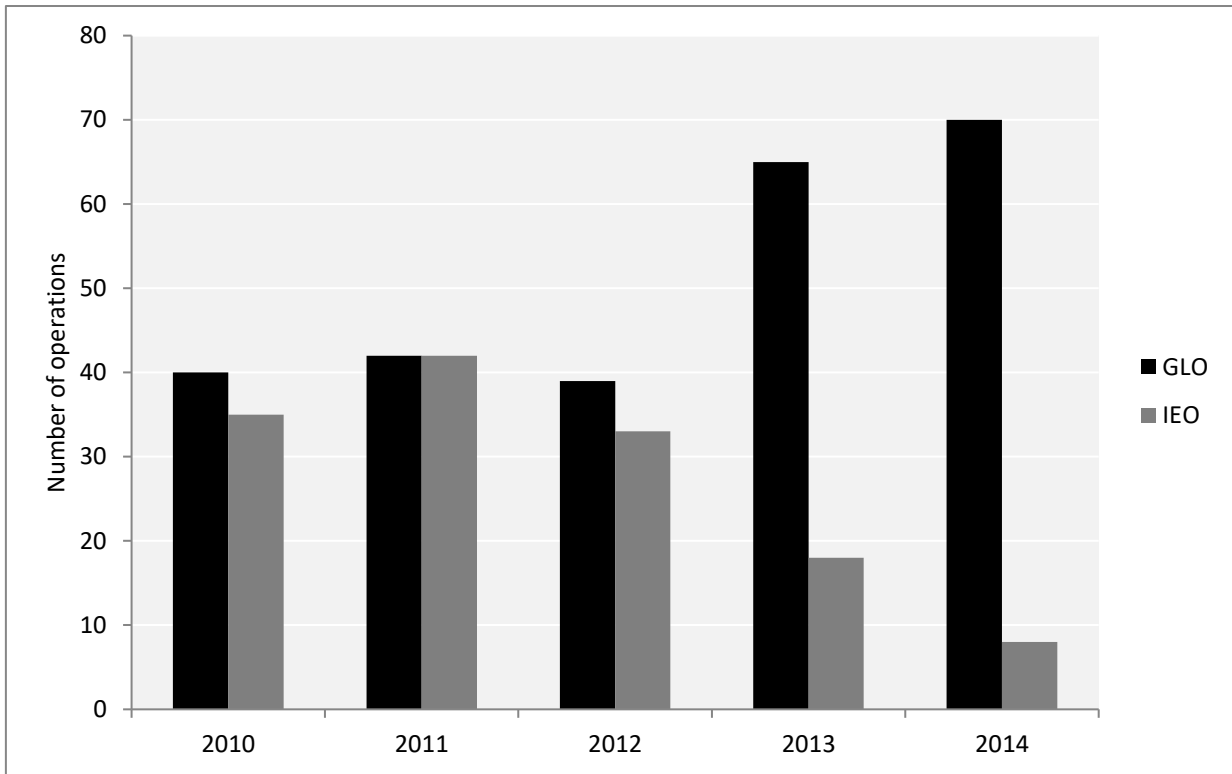

Supplementary figure 2. The annual numbers of distal radius fracture (ICD-10 diagnosis code S52.5) operated as green line operation (GLP, black) and inpatient emergency operations (IEO, grey)
